# Supplementary material for: Toward a coupled model to investigate wave-sea ice interactions in the Arctic marginal ice zone
Source: Copernicus journal article supplement (doi:10.5194/tc-2019-92), 2019-05-27
Supplement: Supplementary file [file tc-2019-92-AC3-supplement.zip]

## **#Reviewer 3:**

### **Anonymous Referee #3**

The manuscript *Toward a coupled model to investigate wave-sea ice interactions in the Arctic marginal ice zone* by Boutin et al. presents a model that couples waves and sea ice dynamics to study the impact of waves on sea ice evolution over the Arctic Ocean. The model includes a floe size and thickness distribution as a prognostic variable that is exchanged between the sea ice and wave components. The FSTD obeys an evolution equation that includes floe-size dependent processes such as lateral melt and wave break-up. A focus is put on the wave radiation stress arising from wave attenuation in sea ice that imposes an additional force on the ice, and on the floe-size dependent lateral melt parameterization. The impact of wave-related processes on sea ice are studied by comparing simulations of NEMO-LIM3 (ice-ocean component) that is coupled and uncoupled to WW3 (wave component) over a pan-Arctic domain, and during two storm case. The comparison is done over a month-long period, at the end of summer 2010, after a 8-year spin-up period. Overall the paper makes a significant contribution to the modeling of polar marine environment in the sense that it provides a very useful tool to study the complexities wave-ice interactions and their impact over different spatio-temporal scales. The discussion puts the study in the context of the recent developments and describes the limitations, thus pointing towards important issues to be addressed in order to make further progress (duration of the simulation, atmospheric and oceanic coupling, floe-size dependent ice rheology missing, freezing period not studied, etc.). It is well written, despite some typos and corrections that need to be made, and descriptions of model implementation and results are detailed enough, although some key information is missing (see below). It is thus worthy of publication, after minor revisions are made.

We thank the reviewer for their careful reading of our manuscript and for their comments and suggestions. We have tried to address their questions and concerns, as detailed in the following. In our comments, PXL<sub>Y</sub> refers to page X line Y of the attached updated manuscript.

### **Specific comments**

**P4. L18.** Wave attenuation is a central piece of the study, as it determines the wave radiation stress and, to a certain extent, the extent of the wave-induced ice break-up area (i.e. the marginal ice zone). Because of this, I suggest that in addition to referring to Ardhuin et al. (2018) for the choice of the wave attenuation, authors recall the main characteristics of the attenuation scheme. Is it floe-size and/or thickness dependent, and how? Is it a dissipative or scattering scheme (or a mix of both)? This could be done in a few lines.

We have added a short description of the processes described in Ardhuin et al. (2018) and Boutin et al. (2018) in P3L27.

**P6. L1.** Another central piece of the study is the ice drift resulting from the momentum balance. Here the WRS is added as an external forcing term that will be balanced by the internal stress, and model solutions may depend strongly on rheology

parameters. I understand that this term (rheology) has not been modified significantly from what's typically used by LIM3 users, and that studying the ice rheology is not the focus of the paper, but it needs to be described minimally here. The rheology contains a few parameters that can be tuned for various reasons, including the compressive strength, the shear-to-compressive strength ratio, if not the yield curve itself or the numerical scheme. Describe what rheology is used and what are the main parameter values. Maybe adding a table would serve well that purpose.

We have added a few comments along with details on the parameters used in the rheology in section 2:

P3L32: *"The model includes a standard Elasto-Visco-Plastic rheology (Hunke and Dukowicz, 1997), using the stress tensor formulation of Bouillon et al. (2013) adapted for the C-grid used in the model. The ice strength is determined following Hibler III (1979), with the ice strength  $P$  following  $P = P^* h e^{C(1-\phi)}$ , where  $P^*=20,000$  N/m<sup>2</sup> and  $C=20$  are empirical positive parameters, and  $h$  is the cell-average sea ice thickness. The plastic failure threshold lies on an elliptical yield curve of which eccentricity is set equal to 2. The number of sub-time steps used to solve the momentum equation is set to 120."*

**P11. L14. Warmer and saltier surface waters in the CPL run seems to point towards that enhanced turbulent mixing arising by increased shear stress between the ice and the ocean, dominates over enhanced melting, which tends to produce fresh and cold anomalies. The following section focuses on an interpretation of that response in terms of the differences between the lateral melt parameterization. Have you looked at mixing as a possible mechanism for explaining it? Are there anomalies in the mixing or mixed layer depth in the marginal ice zone? This mechanism is discussed very clearly later in the two storm cases, but it would be interesting to discuss it also for the pan-Arctic case.**

We had a look at the differences in mixed layer depth and properties, but the signal was very patchy, making it difficult to draw conclusions at the pan-Arctic scale. Indeed, we do believe that local conditions matter a lot (e.g., the relative directions of the wind, sea ice, waves, and surface currents) in determining the impact of the waves, which motivated us to investigate regional cases.

**P19. Eq A3. Define  $D^*$ . And later, define also  $n^*$ . Is  $D^*$  equivalent to  $D_{n^*}$ ?**

Explicit definitions of these terms have been added in the appendix (P21L18,P22L6).

**Some typos**

**P5. L14. Replace actualized by updated.**

Fixed

**P5. L20....is transferred to what has caused this attenuation.**

Fixed

**P5. Eq2. Remove parentheses around  $\sigma$ .**

Fixed

**P6. L22. multi-category.**

Fixed

**P7. L29.c has already been introduced as the concentration earlier.**

We think a reminder might help the reader there.

**P8. L10. Is Toyota et al. (2011) the right reference for this statement? There are older and more appropriate references for this it seems. The smallest floe size that can be generated by flexural break-up is thickness-dependent. Maybe this should be acknowledged.**

We now cite Mellor (1986) instead. This study suggests a formulation for this lower limit of floe size that can break due to flexural break-up. The fact that this lower limit is thickness dependent is true but adding it to the text might add confusion in our opinion, as this paragraph focuses on the definition of floe size categories with constant upper and lower limits.

**P8. L25. Uncoupled instead of not coupled (also at various other place in the manuscript).**

Fixed

**P9. L8. Based on a number of observations.**

Fixed

**P9. L17. Rather than on sea ice conditions.**

Fixed (with concentration instead of conditions)

**P10. L8....on sea ice conditions.**

Fixed

**P10. L19. There is no panel e on Fig. 5.**

Fixed

**P11. L9. Do you refer to the grid cell average thickness?**

Yes, we edited so that it is now clearly specified.

**P11. L11. There are also differences...**

Fixed

**P12. L1....property anomalies.**

Fixed (we kept the word *difference* to keep coherency with the rest of the text)

**P14. L6. Difference (singular).**

Fixed

**P17. L24. when trying to forecast...**

Fixed

**Fig2. Schematic summary of...The two boxes correspond...**

Fixed

**Fig3. Panel c. notcpl should be replaced by NOT\_CPL in the index. You can also specify the run elsewhere than in the index to avoid expanding indices.**

Fixed

**Fig5. The black and grey contours...**

Fixed
